# Supplementary material
Source: MDPI journal article supplement (https://www.mdpi.com/2072-4292/5/5/2200)

*Note:*

For improved clarity, Figure 1 on page 2203 is shown again below:

**Figure 1.** Map of England showing locations of the cameras used for the results shown in this paper. The bold lines represent the roads covered by Highways Agency cameras.

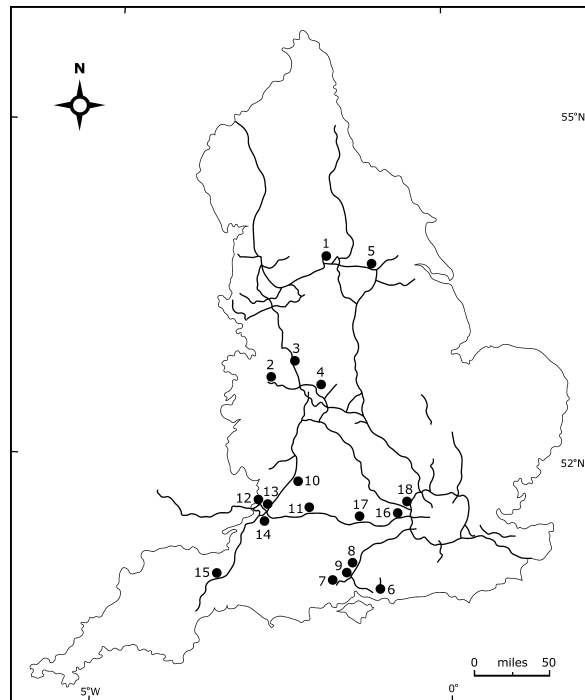

Supplement: s1 [file s1 › remotesensing-05-02200-note.pdf]
